# Supplementary material for: Alum Pickering Emulsion as Effective Adjuvant to Improve Malaria Vaccine Efficacy
Source: MDPI journal article supplement (doi:10.3390/vaccines9111244), 2021-10-26
Supplement: s1 [file s1]

### Supplemental data

**Table S1.** Serum biochemical parameters ( $n = 8$ ).

| Group | BUN (U/L) | ALT (U/L)  | AST (U/L)   | LDH (U/L)      | ALP (U/L)    |
|-------|-----------|------------|-------------|----------------|--------------|
| PBS   | 7.9 ± 0.4 | 31.6 ± 5.8 | 73.1 ± 11.2 | 1683.5 ± 374.5 | 95.0 ± 2.9   |
| Al    | 8.0 ± 0.4 | 33.4 ± 6.2 | 77.9 ± 15.4 | 1550.5 ± 424.2 | 109.8 ± 11.9 |
| ALPE  | 7.3 ± 0.7 | 33.9 ± 4.8 | 70.0 ± 11.1 | 1282.0 ± 221.4 | 97.0 ± 20.5  |
| ALMPE | 7.4 ± 0.4 | 34.0 ± 2.4 | 76.8 ± 5.7  | 1302.3 ± 125.3 | 93.6 ± 5.5   |
